# Supplementary material
Source: Springer Nature journal article supplement (https://www.springermedizin.de/resource/supplementary/13041_2013_248_MOESM1_ESM.pdf/25657870)

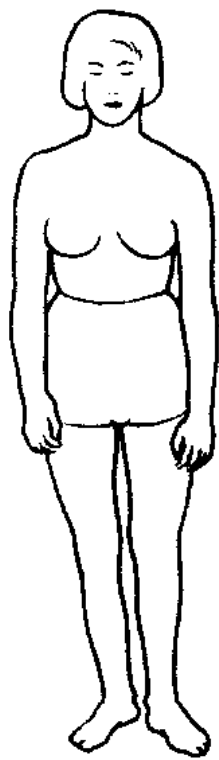

30

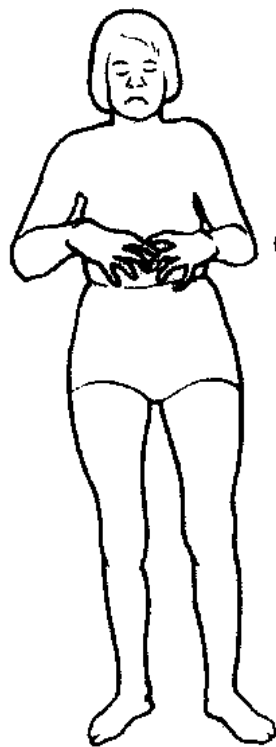

330

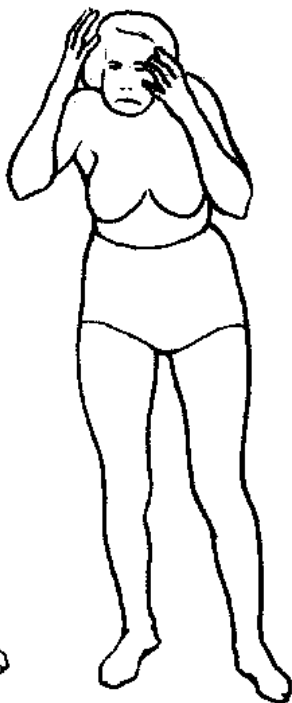

460

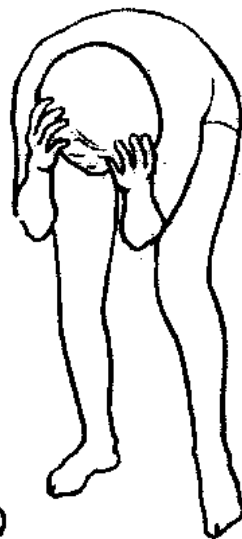

1260

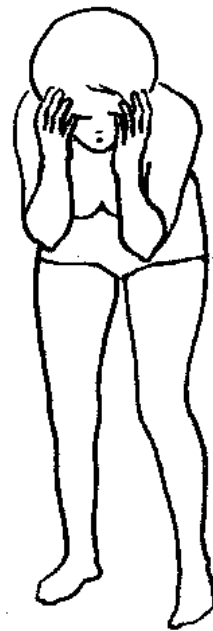

2540

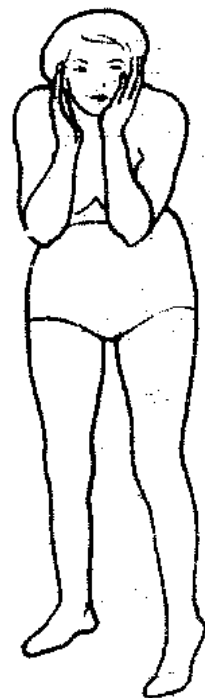

3190

Supplement: MOESM1 [file 25657870]
